# Supplementary material
Source: PubMed Central journal article supplement (PMC5823691)
Supplement: NIHMS943187-supplement-Supporting_Information.pdf [file NIHMS943187-supplement-Supporting_Information.pdf]

## SUPPORTING INFORMATION

### *Small-Molecule Inhibitors of the CD40–CD40L Costimulatory Protein-Protein Interaction*

J. Chen, Y. Song, D. Bojadzic, A. Tamayo-Garcia, A. M. Landin, B. B. Blomberg, and P. Buchwald

#### **Table of Contents (Supporting Information)**

**Figure S1.** Inhibition of the Mac-1–CD40L interaction

**Figure S2.** Inhibition of CD40L-induced MHC-II upregulation in THP-1 cells.

**Figure S3.** MTT cytotoxicity assessment in THP-1 cells.

**Figure S4.** Mutagenicity assessment (Ames test).

**Figure S5.** Inhibition of CD40L-induced human B cell proliferation.

**Figure S6.** Flow cytometry histograms illustrating the inhibition of CD40L-induced human B-cell function (AID activation).

**Figure S7.** CD40–CD40L blocking activity of KGY15 15-mer CD40 peptide inhibitors.

**Scheme S1:** Synthesis of compound **5**.

**Scheme S2:** Synthesis of compound **7**.

**Scheme S3:** Synthesis of compound **11**.

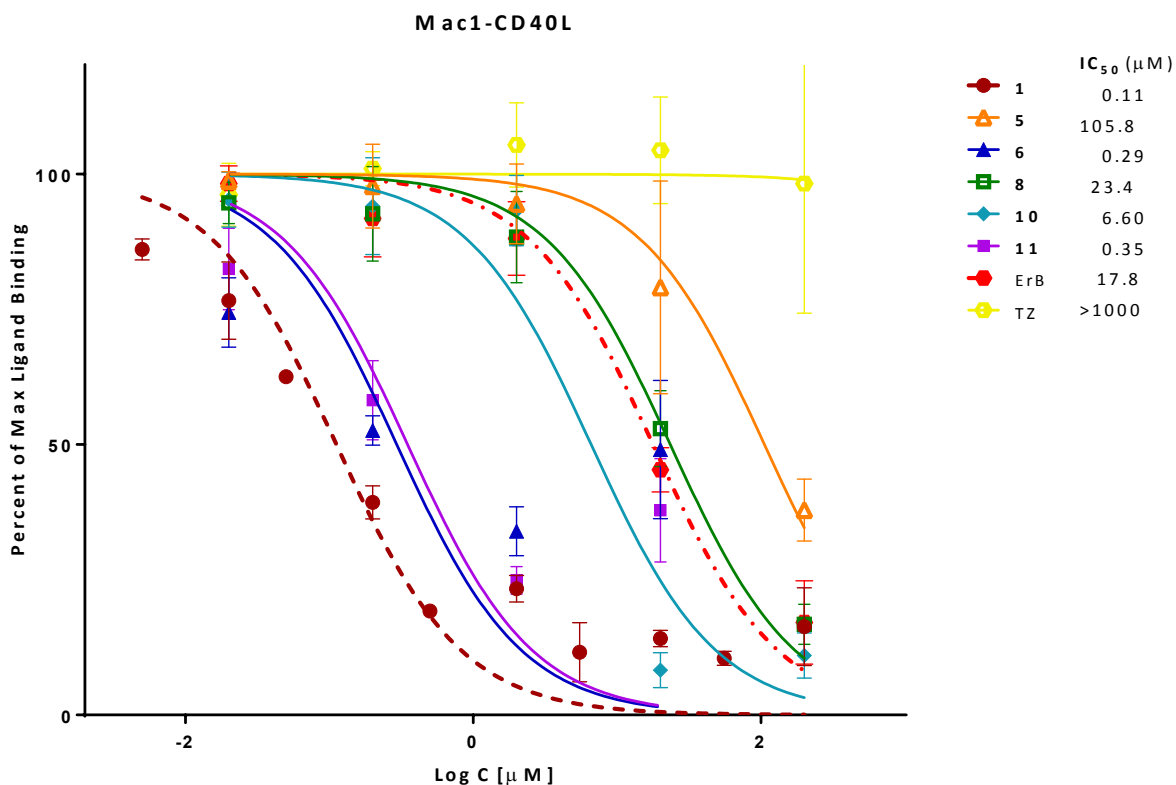

**Figure S1.** Concentration-dependent inhibition of the human Mac-1–CD40L interaction by selected compounds quantified using a cell-free ELISA-type assay and fitted with standard binding curves. In addition to the organic dye **1** included for comparison, tartrazine (TZ) and the promiscuous PPI inhibitor erythrosine B (ErB) were also included as negative and positive controls, respectively. Data are average  $\pm$  SD (normalized to percent binding) for  $n = 3$  independent experiments with duplicates for each condition; corresponding IC<sub>50</sub> values are shown on the right.

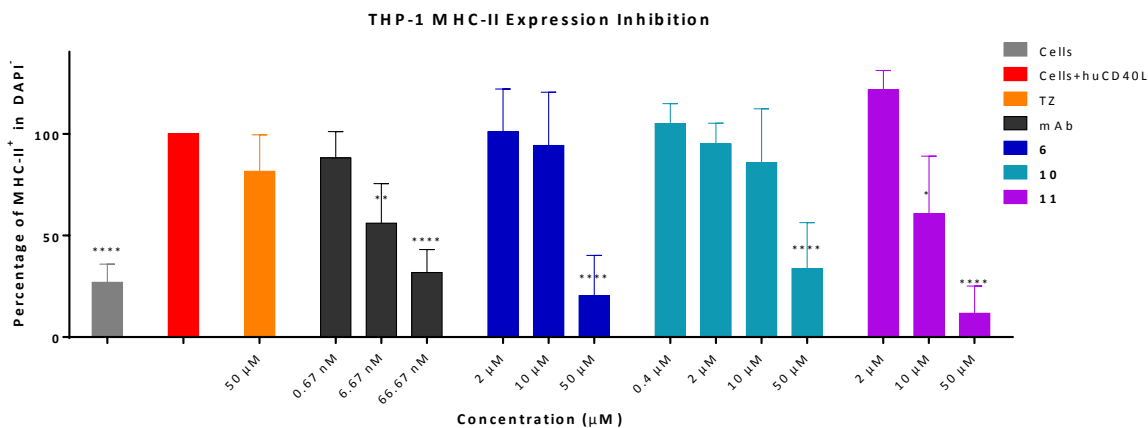

**Figure S2.** Concentration-dependent inhibition of CD40L-induced (0.5 µg/mL MegaCD40L; Enzo Life Sciences) MHC-II upregulation in THP-1 cells by the present novel compounds (**6**, **10**, and **11**) with tartrazine (TZ) and an anti-CD40L antibody (mAb) included as negative and positive controls, respectively. Data are average ± SD in live (DAPI<sup>+</sup>) cells from five independent experiments and were analyzed by one-way ANOVA followed by Dunnett's multiple comparison test, \* $p < 0.05$ , \*\* $p < 0.01$ , \*\*\*\* $p < 0.0001$  vs. cells + huCD40L.

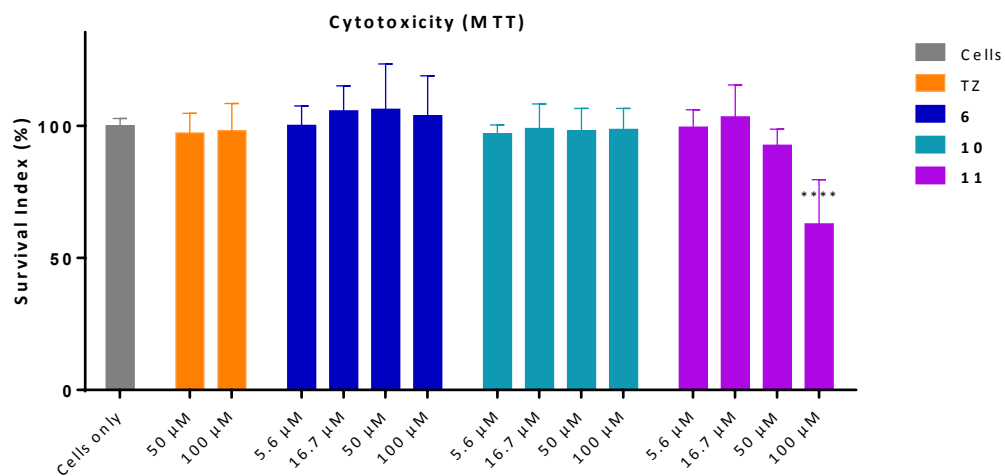

**Figure S3.** Toxicity assessment of selected new compounds (e.g., **6**, **10**, and **11**) with tartrazine (TZ) as a negative control using a standard MTT cytotoxicity assay in THP-1 cells. Data are average  $\pm$  SD of three experiments in duplicate and were analyzed by one-way ANOVA followed by Dunnett's multiple comparison test, \*\*\*\*  $p < 0.0001$  vs. cells only.

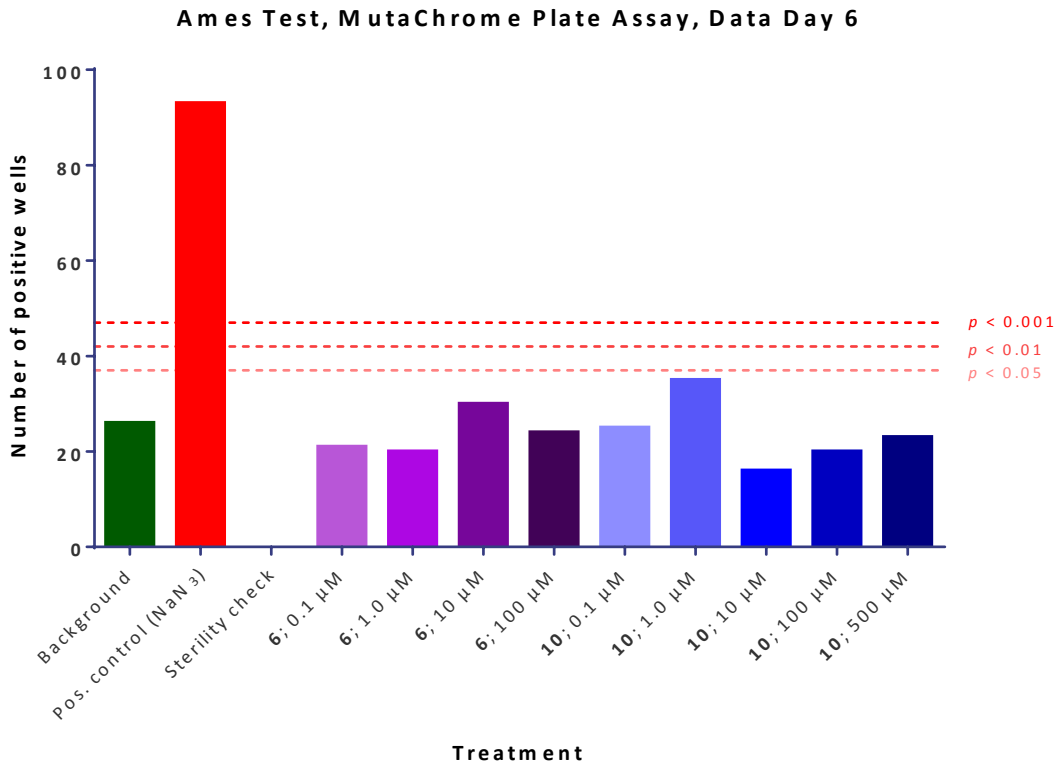

**Figure S4.** Assessment of mutagenicity (Ames test) for compounds **6** and **10** using a Muta-Chromplate assay. Data are the number of positive cells from 96-well microplates (one plate per condition; reading of day 6), and the horizontal dashed red lines indicate the number of positive wells needed for statistically significant effects at the indicated level.

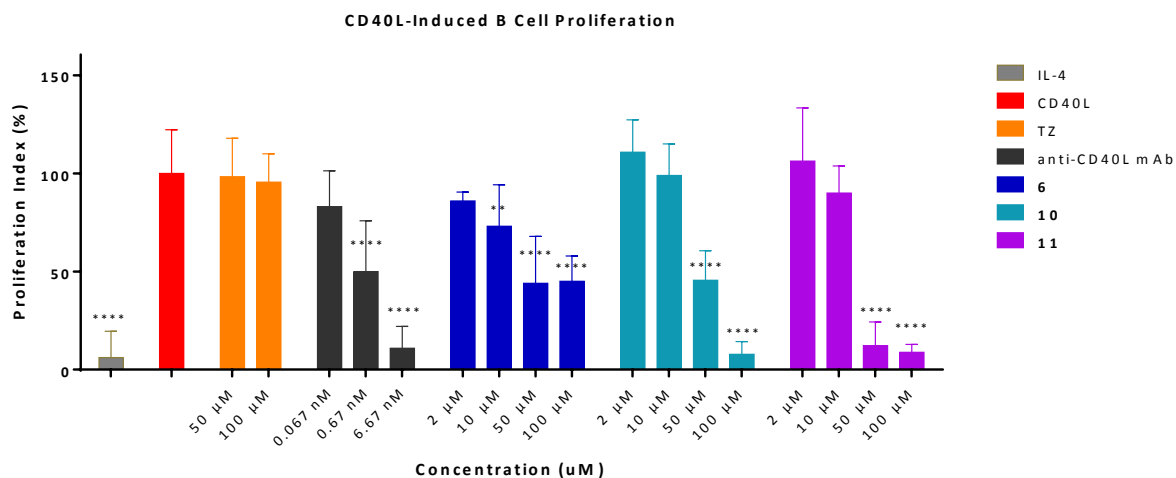

**Figure S5.** Concentration-dependent inhibition of CD40L-induced (0.1 µg/mL *Mega*CD40L, Enzo Life Sciences) human B cell proliferation by compounds **6**, **10**, and **11** with tartrazine (TZ) and an anti-CD40L monoclonal antibody (mAb) included as negative and positive controls, respectively. Data are average  $\pm$  SD for  $n = 3$  independent experiments with triplicates for each condition using a standard BrdU assay (Roche). Data were analyzed by one-way ANOVA followed by Dunnett's multiple comparison test, \*\* $p < 0.01$ , \*\*\*\* $p < 0.0001$  vs. CD40L.

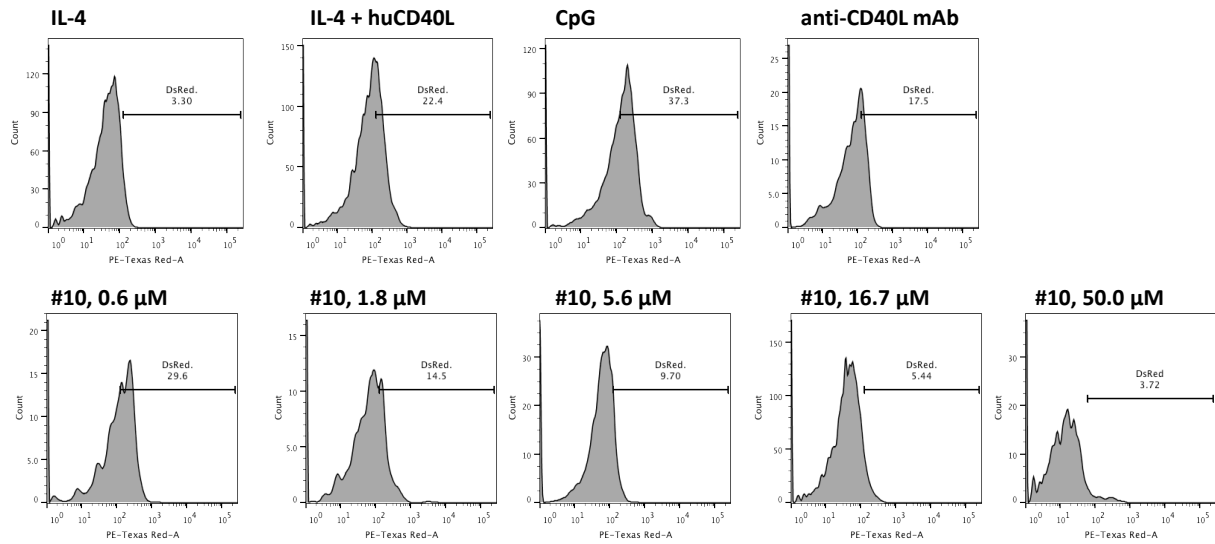

**Figure S6.** Representative flow cytometry histograms illustrating the concentration-dependent inhibition of CD40L-induced human B-cell function (AID activation quantified via a fluorescent marker detected by flow cytometry) by compound **10** with corresponding controls as indicated corresponding to the average data shown in Figure 6.

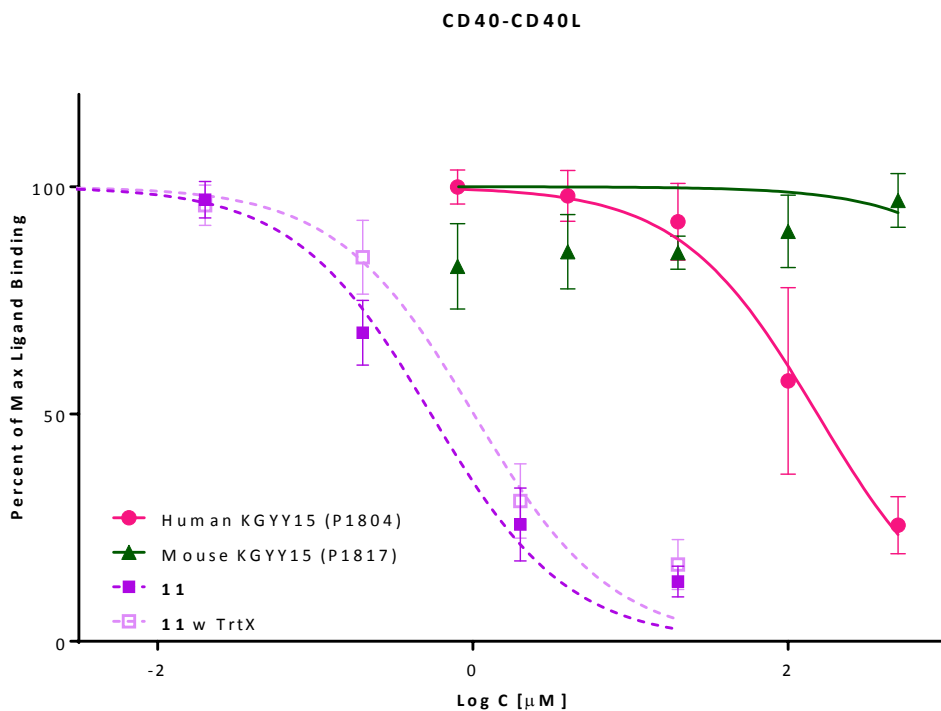

**Figure S7.** Blocking activity of KGY<sub>15</sub> 15-mer CD40 peptide inhibitors<sup>19</sup> in the present human CD40–CD40L binding assay. Mouse KGY<sub>15</sub> (VLQWAKKGYITMKS<sub>N</sub>) and human KGY<sub>15</sub> (VLQWAEKGYITMS<sub>NN</sub>) were tested in the same ELISA assay (Figure 4) as all other inhibitors here giving IC<sub>50</sub>s of >5000 and 154 µM, respectively. For comparison, the inhibitory activity of **11** is also included as retested with or without added Triton-X 100 (0.01%), a non-ionic detergent used to check that the inhibitory effect is not due to aggregation (IC<sub>50</sub>s of 1.01 and 0.54 µM, respectively).



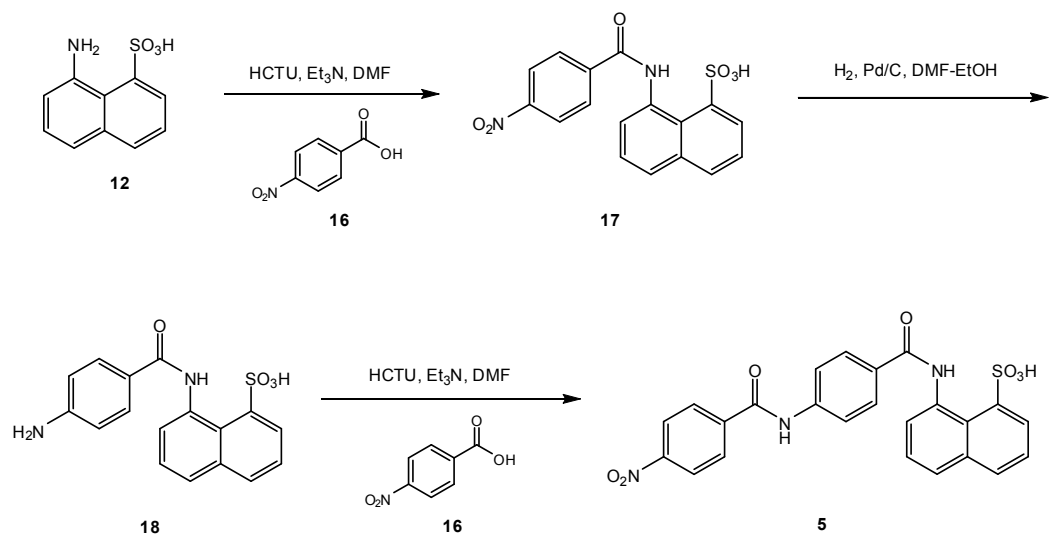

**Scheme S1.** Synthesis of compound 5.

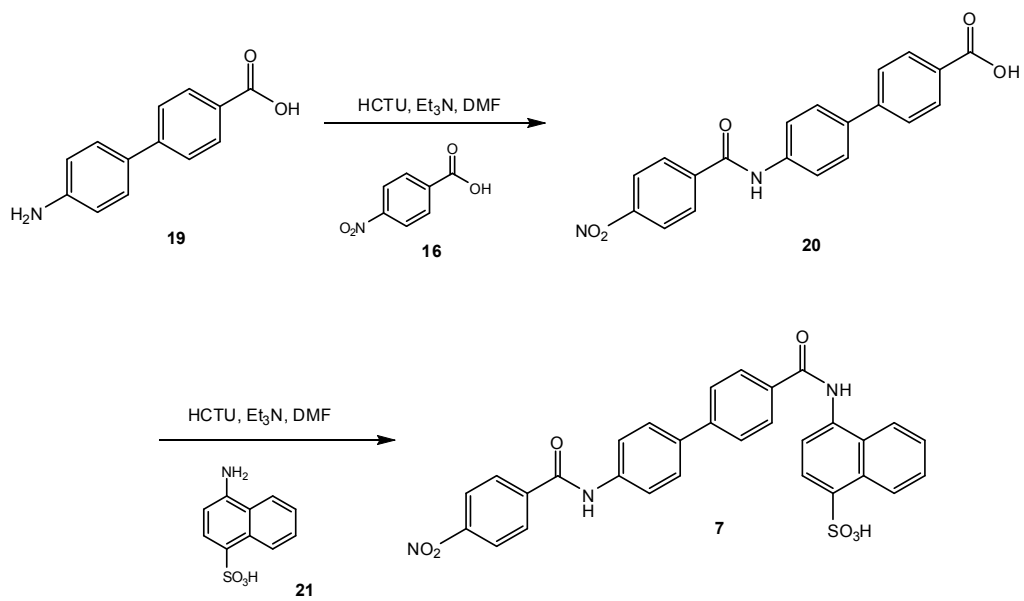

**Scheme S2.** Synthesis of compound 7.

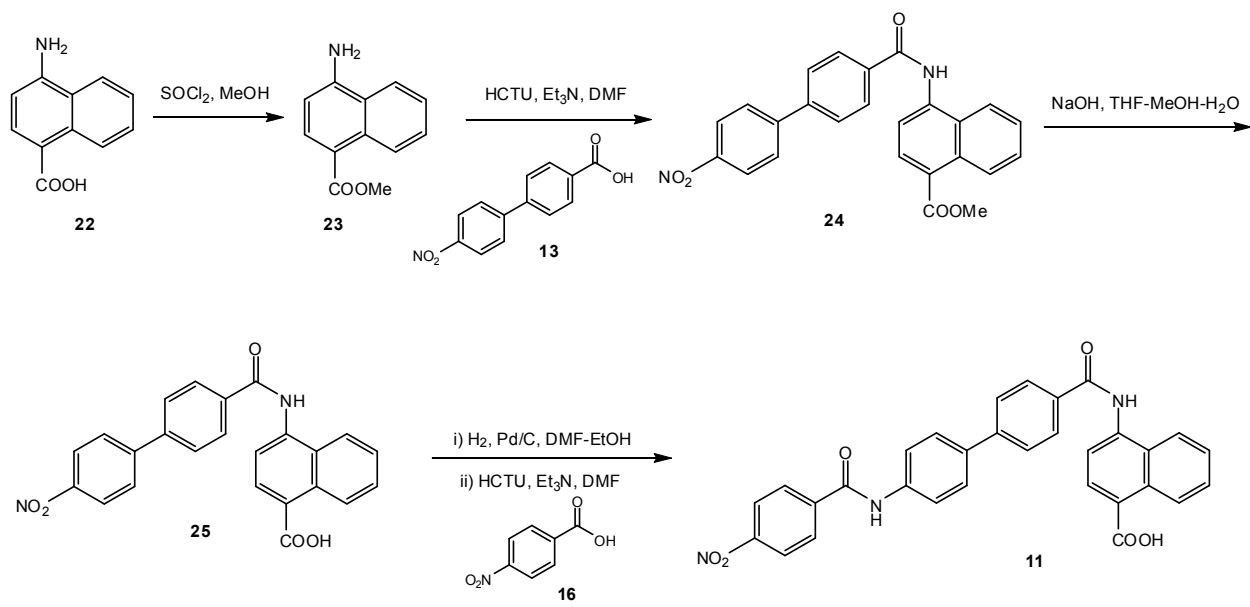

**Scheme S3.** Synthesis of compound **11**.
